# Supplementary material for: Healthy eating promoting in a Brazilian sports-oriented school: a pilot study
Source: PeerJ. 2019 Aug 28;7:e7601. doi: 10.7717/peerj.7601 (PMC6717494; doi:10.7717/peerj.7601)
Supplement: Supplemental Information 2 [file peerj-07-7601-s002.xlsx]

## Sheet: Sheet1
beans	french fries	fried snack	processed meat	raw salad	cooked vegetables	crackers	cookies	candies	fruits	milk	soft drinks
7	0	0	5	2	0	0	1	0	0	3	1
5	0	2	1	0	1	2	0	0	2	0	3
7	0	1	1	0	7	3	4	0	3	7	3
7	0	1	1	2	1	1	1	0	5	6	2
7	0	0	1	7	6	0	1	0	7	4	3
5	0	0	1	0	0	1	1	0	7	5	0
6	0	0	2	0	6	4	2	0	7	7	2
3	0	0	2	1	3	3	7	0	7	7	0
2	0	0	2	0	1	1	0	1	0	0	2
5	2	0	2	0	2	2	2	1	0	7	2
7	1	0	2	0	0	7	7	1	0	7	6
7	1	1	4	0	1	1	1	1	1	6	0
7	0	0	1	3	7	1	1	1	1	7	0
7	0	1	3	0	7	7	2	1	1	7	3
5	0	1	2	1	1	2	0	1	2	0	7
7	0	2	1	0	1	2	1	1	3	7	0
7	1	0	0	0	3	1	0	1	4	0	3
5	0	1	1	0	5	2	0	1	5	1	1
7	0	1	0	4	2	1	0	1	6	0	2
7	1	0	1	2	3	0	0	1	7	0	0
7	0	1	1	0	1	1	0	1	7	0	2
6	0	0	7	1	0	0	1	1	7	3	0
7	0	1	3	3	4	0	1	1	7	4	2
7	4	7	0	4	7	0	1	1	7	4	3
5	0	5	6	4	1	3	3	1	7	7	3
7	0	0	0	0	5	0	0	2	0	0	1
7	0	0	0	1	0	7	0	2	1	1	4
7	1	2	0	0	2	0	1	2	1	3	7
1	1	1	2	0	0	1	2	2	1	7	1
7	0	1	1	1	5	1	2	2	2	7	2
7	0	1	1	2	3	0	1	2	3	4	0
7	1	0	0	1	3	0	0	2	4	0	0
7	0	0	0	3	7	0	0	2	7	0	1
7	0	1	1	4	2	1	0	2	7	0	3
7	0	0	1	1	7	0	7	2	7	7	0
5	1	2	1	0	5	0	0	2	0	0	1
7	1	0	1	0	3	2	1	3	1	7	1
6	0	1	0	0	4	0	3	3	1	7	3
7	1	0	3	4	0	2	2	3	2	7	2
7	1	1	1	0	0	1	0	3	3	0	1
7	1	0	0	1	3	1	2	3	4	7	2
7	0	0	3	0	2	1	0	3	5	0	2
6	0	1	1	0	1	1	0	3	7	0	1
7	2	1	1	1	0	2	1	3	7	7	0
7	0	0	3	0	1	2	2	3	7	7	2
7	2	2	1	1	1	3	2	3	7	7	2
7	1	0	3	0	1	2	0	4	1	0	4
7	1	1	2	0	2	1	2	4	6	7	2
7	0	2	7	3	1	2	0	4	7	0	7
4	0	0	0	3	3	1	0	5	7	0	4
6	0	2	1	0	7	3	1	5	7	7	1
7	0	1	0	1	2	0	1	6	2	3	7
7	0	0	1	1	1	2	1	6	7	7	0
7	0	0	3	1	1	0	0	7	0	0	0
7	0	0	3	1	1	0	2	7	0	7	1
7	1	2	7	1	0	6	0	7	1	1	1
7	0	1	4	2	2	0	2	7	2	7	1
5	0	0	0	0	2	1	5	7	2	7	2
7	0	0	1	1	1	1	1	7	3	6	2
7	2	0	7	0	0	1	2	7	3	7	1
6	0	0	1	0	0	4	2	7	3	7	2
7	1	1	3	0	2	2	2	7	4	7	2
7	0	0	2	0	3	2	3	7	4	7	3
7	0	1	3	0	0	1	0	7	5	0	1
7	0	1	3	2	3	2	0	7	5	1	0
7	0	0	4	0	2	7	7	7	5	7	7
5	2	2	3	0	5	7	7	7	5	0	1
7	0	1	1	0	7	7	0	7	7	1	7
7	0	1	7	7	7	0	1	7	7	4	4
7	1	0	6	0	2	0	2	7	7	7	1
7	7	1	0	1	4	0	2	7	7	7	1
7	1	1	1	2	7	1	2	7	7	7	2
7	1	1	0	0	7	3	3	7	7	7	3
7	0	2	3	7	7	3	3	7	7	7	3
7	3	1	7	1	5	1	4	7	7	7	4
7	1	0	0	2	7	1	5	7	7	7	1
5	2	1	3	0	2	0	7	6	5	7	0
6	0	0	1	2	0	0	1	0	7	3	0
7	0	1	4	0	5	0	0	0	4	0	0
7	0	2	4	1	5	1	7	3	4	0	1
7	0	0	4	4	7	0	4	4	4	3	4
7	0	0	3	3	0	0	6	4	3	2	0
7	0	0	1	7	0	1	1	3	7	4	0
7	0	1	1	5	1	4	6	3	7	3	0
7	0	2	0	7	4	0	0	2	1	7	1
7	0	0	0	1	3	3	0	3	1	7	2
7	1	1	1	0	6	0	7	0	7	1	3
7	0	2	4	6	7	0	3	0	5	2	4
7	0	0	3	3	0	0	0	0	5	5	0
7	0	0	0	1	4	1	0	0	6	0	0
